# Supplementary material for: Direct synthesis of 3D hollow porous graphene balls from coal tar pitch for high performance supercapacitors
Source: Royal Society of Chemistry journal article supplement (doi:10.1039/c4ta03323j), 2014-01-01
Supplement: c4ta03323j1.pdf [file c4ta03323j1.pdf]

## Supporting Information

### **Direct synthesis of 3D hollow porous graphene balls from coal tar pitch for high performance supercapacitors**

Xiaojun He <sup>a,\*</sup>, Hebao Zhang <sup>a</sup>, Hao Zhang <sup>a</sup>, Xiaojing Li <sup>a</sup>, Nan Xiao <sup>b</sup>, and Jieshan

Qiu <sup>b,\*</sup>

<sup>a</sup> School of Chemistry and Chemical Engineering, Anhui Key Lab of Coal Clean Conversion and Utilization, Anhui University of Technology, No. 59 Hudong Road, Maanshan 243002, China

<sup>b</sup> Carbon Research Lab, Liaoning Key Lab for Energy Materials and Chemical Engineering, State Key Lab of Fine Chemicals, Dalian University of Technology, Dalian 116024, China

---

\*Corresponding authors. Tel: +86-555-2312355. Fax: +86-555-2311822. E-mail:

[agdxjhe@126.com](mailto:agdxjhe@126.com) (X.J. He); Tel: +86-411-84986024. Fax: +86-411-84986015. E-

mail: [jqiu@dlut.edu.cn](mailto:jqiu@dlut.edu.cn) (J. S. Qiu).

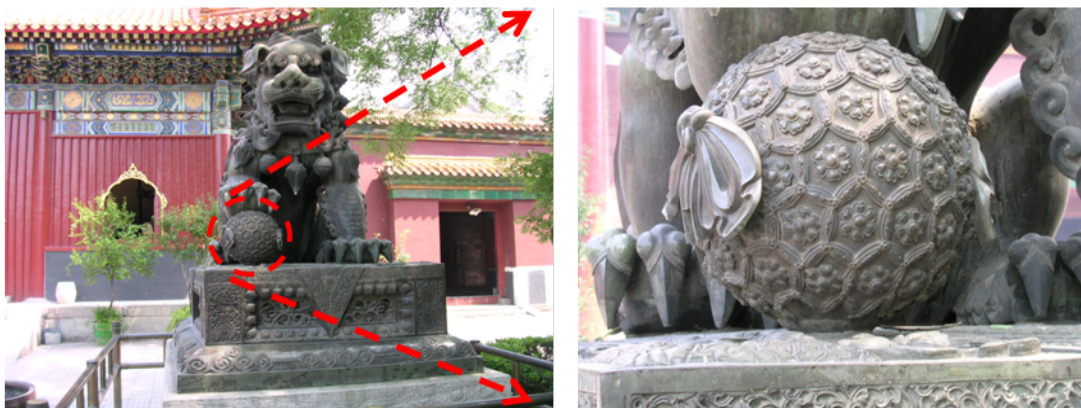

**Fig. S1.** A graphene-like stone ball under the foot of a monster in front of the **Lama Temple** in Beijing of China, which was designed and built as an art decoration in 1694 in Qing dynasty. The stone ball seems to be made of a blown graphene sheet with only carbon six-member rings.

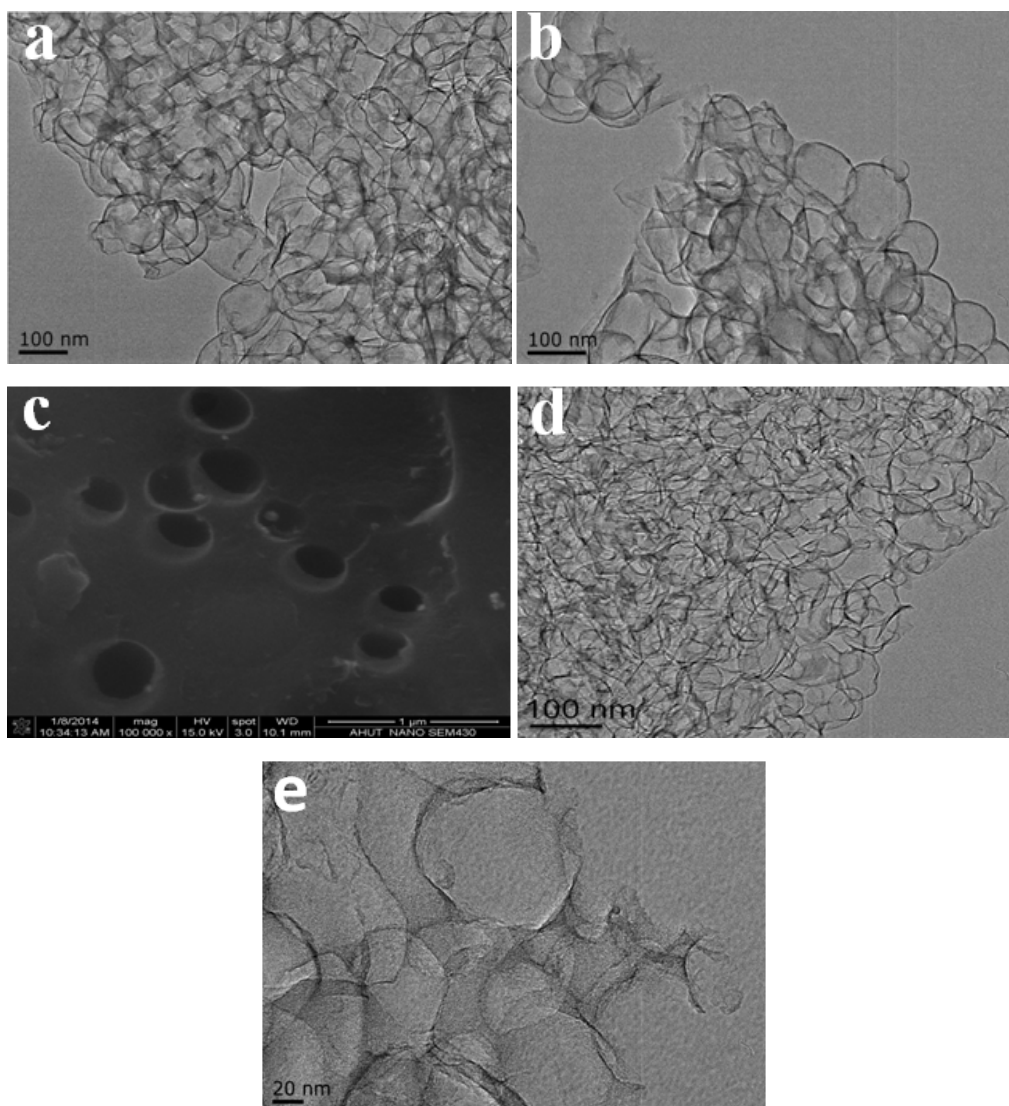

**Fig. S2.** (a) TEM image of HPGB<sub>NP-6</sub>; (b) TEM image of HPGB<sub>NP-4</sub>; (c) FESEM image of PC<sub>1Ar</sub>; (d) TEM image of HPGB<sub>2Ar</sub>; (e) TEM image of HPGB<sub>Ar</sub>.

Fig. S2a and b show the TEM images of HPGBs (HPGB<sub>NP-6</sub> and HPGB<sub>NP-4</sub>) that were synthesized directly from coal tar pitch by a simple nano-MgO template strategy coupled with KOH activation at pressure of  $-0.05$  to  $-0.10$  MPa. Fig. S2c shows that only conventional porous carbon (PC<sub>1Ar</sub>) was synthesized in the absence of nano-MgO template. Fig. S2d shows the TEM image of HPGB (HPGB<sub>2Ar</sub>) with some wrinkles that was made from coal tar pitch by only using nano-MgO as template. Fig. S2e shows the TEM image of HPGB<sub>Ar</sub>.

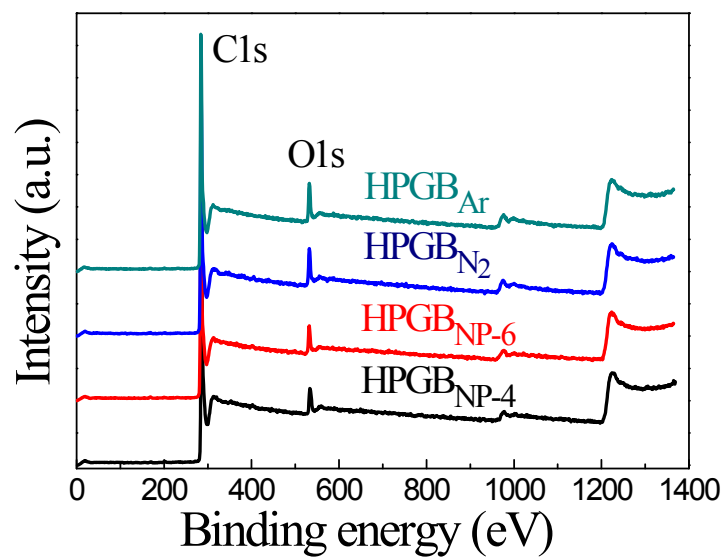

**Fig. S3.** XPS spectra of HPGBs, showing that no observable N-species ( $\approx 396$  eV, N1s) are present in HPGB<sub>Ar</sub>, HPGB<sub>N<sub>2</sub></sub>, HPGB<sub>NP-6</sub> and HPGB<sub>NP-4</sub>. This means that the working gas atmosphere is not involved in the chemical reactions related to HPGBs under the experimental conditions.
